# Supplementary material for: eATP/P2X7R Axis: An Orchestrated Pathway Triggering Inflammasome Activation in Muscle Diseases
Source: MDPI journal article supplement (doi:10.3390/ijms21175963), 2020-08-19
Supplement: s1 [file s1]

Supplemental Table S1

| Target | ID                                                              | Title                                                                                                                                                                                                         | Disease              | Phase | Status    |
|--------|-----------------------------------------------------------------|---------------------------------------------------------------------------------------------------------------------------------------------------------------------------------------------------------------|----------------------|-------|-----------|
| P2XR7  | NCT00849134                                                     | First Time in Human Study Evaluating the Safety, Tolerability, Pharmacokinetics, Pharmacodynamics and the Effect of Food of Single Ascending Doses of GSK1482160.                                             | inflammatory pain    | I     | Completed |
| P2XR7  | NCT00628095                                                     | Study of CE-224,535 A Twice Daily Pill To Control Rheumatoid Arthritis In Patients Who Have Not Totally Improved With Methotrexat                                                                             | rheumatoid arthritis | II    | Completed |
| P2XR7  | NCT00520572                                                     | A 6-month Randomised, Double-blind, Open Arm Comparator, Phase IIb, With AZD9056, in Patients With Rheumatoid Arthritis (RA)                                                                                  | rheumatoid arthritis | II    | Completed |
| P2XR7  | Eudra-CT Number: 2005-002319-26<br>Protocol Number: D8830C00002 | Safety and Efficacy of an Oral Inhibitor of the Purinergic Receptor P2X7 in Adult Patients with Moderately to Severely Active Crohn's Disease: A Randomized Placebo-controlled, Double-blind, Phase IIa Study | Crohn disease        | II    | Completed |
| P2XR7  | NCT02587819                                                     | Investigation of the Safety and Tolerability of BSCT (Anti-nf-P2X7) 10% Ointment                                                                                                                              | basal cell carcinoma | I     | Completed |
